# Supplementary material for: Chronic treatment with fluoride affects the jejunum: insights from proteomics and enteric innervation analysis
Source: PubMed Central journal article supplement (PMC5816638; doi:10.1038/s41598-018-21533-4), 2018-02-16
Supplement: 41598_2018_21533_MOESM1_ESM.pdf [file 41598_2018_21533_MOESM1_ESM.pdf]

## **Title**

### **Chronic treatment with fluoride affects the jejunum: insights from proteomics and enteric innervation analysis**

Aline Salgado Dionizio <sup>1</sup>

Carina Guimarães Souza Melo <sup>1</sup>

Isabela Tomazini Sabino-Arias <sup>1</sup>

Talita Mendes Silva Ventura <sup>1</sup>

Aline Lima Leite <sup>1</sup>

Sara Raquel Garcia Souza <sup>2</sup>

Erika Xavier Santos <sup>2</sup>

Alessandro Domingues Heubel<sup>1</sup>

Juliana Gadelha Souza <sup>1</sup>

Juliana Vanessa Colombo Martins Perles<sup>2</sup>

Jacqueline Nelisis Zanoni <sup>2</sup>

Marília Afonso Rabelo Buzalaf <sup>1\*</sup>

<sup>1</sup> Department of Biological Sciences, Bauru School of Dentistry, University of São Paulo, Bauru, Brazil.

<sup>2</sup> Department of Morphophysiological Sciences, State University of Maringá, Maringá, Brazil.

#### **\* Corresponding author**

Marília Afonso Rabelo Buzalaf

Alameda Octávio Pinheiro Brisolla, 9-75

Bauru-SP, Brazil, 17012-901

Phone: # 55 14 3235-8346

Email: [mbuzalaf@fob.usp.br](mailto:mbuzalaf@fob.usp.br)

**Supplementary Table S1.** Proteins identified exclusively in the jejunum of rats of control group.

| <b><sup>a</sup>Access number</b> | <b>Protein name</b>                                                 | <b><i>PLGS Score</i></b> |
|----------------------------------|---------------------------------------------------------------------|--------------------------|
| P63326                           | 40S ribosomal protein S10                                           | 86.29                    |
| Q9ER34                           | Aconitate hydratase, mitochondrial                                  | 56.82                    |
| Q68FP8                           | Adenylate kinase 8                                                  | 57.06                    |
| O09178                           | AMP deaminase 3                                                     | 63.74                    |
| Q7TP90                           | Arrestin domain-containing protein 4                                | 119.76                   |
|                                  | Ash2 (Absent, small, or homeotic)-like (Drosophila)                 |                          |
| D3ZTV7                           | (Predicted)                                                         | 58.22                    |
| Q8K1M8                           | BMP/retinoic acid-inducible neural-specific protein 2               | 77.73                    |
| Q6AXW0                           | Borealin                                                            | 85.75                    |
| Q6MGA9                           | Bromodomain-containing protein 2                                    | 36.96                    |
| Q5XIR8                           | Clathrin heavy chain linker domain-containing protein 1             | 45.92                    |
| A6JUQ6                           | Clavesin-2                                                          | 125.81                   |
| Q6AY97                           | Coiled-coil domain-containing protein 91                            | 59.96                    |
| F1LQC8                           | Cyclin-dependent kinase 7                                           | 106.02                   |
| P51952                           | Cyclin-dependent kinase 7 (Fragment)                                | 106.02                   |
| P00173                           | Cytochrome b5                                                       | 110.98                   |
|                                  | Cytochrome c oxidase subunit 4 isoform 1, mitochondrial             |                          |
| P10888                           |                                                                     | 95.86                    |
| Q5PPJ4                           | Deoxyhypusine hydroxylase                                           | 97.36                    |
| Q9Z1Z3                           | Epsin-2                                                             | 77.85                    |
| Q5RKI1                           | Eukaryotic initiation factor 4A-II                                  | 82.70                    |
| F1LM27                           | Gamma-aminobutyric acid receptor subunit pi                         | 73.39                    |
| F8WFK6                           | Glutathione peroxidase                                              | 101.68                   |
|                                  | Golgi autoantigen, golgin subfamily b, macrogolgin 1, isoform CRA_c |                          |
| G3V6A8                           |                                                                     | 34.84                    |
| Q5XHZ0                           | Heat shock protein 75 kDa, mitochondrial                            | 386.33                   |
| D3ZMT4                           | Histidine decarboxylase                                             | 60.20                    |
| M0RCB8                           | Histone H3 (Fragment)                                               | 61.07                    |
| Q4KLJ2                           | Integral membrane protein 2A                                        | 45.35                    |
| G3V667                           | Integrin, alpha 6, isoform CRA_a                                    | 42.01                    |
| Q63679                           | Lysine-specific demethylase 3A                                      | 37.26                    |
| O88989                           | Malate dehydrogenase, cytoplasmic                                   | 152.62                   |
| Q5EB94                           | Myocardial zonula adherens protein                                  | 63.78                    |
|                                  | NADH dehydrogenase [ubiquinone] flavoprotein 2, mitochondrial       |                          |
| P19234                           |                                                                     | 85.87                    |
| A0JPJ0                           | Nicotinamide nucleotide adenyltransferase 1                         | 157.53                   |
| Q78PB6                           | Nuclear distribution protein nudE-like 1                            | 64.22                    |
| F1LUD2                           | Olfactory receptor                                                  | 75.58                    |
| G3V7X0                           | Outer dense fiber of sperm tails 2, isoform CRA_e                   | 52.20                    |
|                                  | Phosphoribosyl pyrophosphate synthase-associated protein 1          |                          |
| Q63468                           |                                                                     | 40.67                    |
| P20961                           | Plasminogen activator inhibitor 1                                   | 110.43                   |
| P30427                           | Plectin                                                             | 66.57                    |
| Q99PT0                           | Probable ATP-dependent RNA helicase DDX52                           | 66.23                    |
| P10960                           | Prosaposin                                                          | 101.41                   |
| D4A332                           | Protein Ankle1                                                      | 67.55                    |
| D3ZUL3                           | Protein Col6a1                                                      | 115.75                   |
| D4AD15                           | Protein Eif4g1                                                      | 39.23                    |
| D3ZXM4                           | Protein Evi5l                                                       | 163.14                   |

|        |                                                            |        |
|--------|------------------------------------------------------------|--------|
| D3Z8Z2 | Protein Fam53b                                             | 41.90  |
| D3ZQI9 | Protein Iffo1                                              | 51.19  |
| D4AE58 | Protein Kank1                                              | 33.30  |
| Q6IFW7 | Protein Krt28                                              | 46.34  |
| F1MAF7 | Protein Krt33b                                             | 63.25  |
| D3Z9W1 | Protein LOC100271845                                       | 93.32  |
| D3ZJY5 | Protein LOC100360905                                       | 81.87  |
| D4A609 | Protein LOC100361741                                       | 53.06  |
| D3ZET2 | Protein LOC100910851                                       | 39.52  |
| M0RC68 | Protein LOC100911797                                       | 39.52  |
| D3ZMU9 | Protein LOC102547078 (Fragment)                            | 92.54  |
| D4A4U8 | Protein LOC299277                                          | 110.61 |
| D3ZBD0 | Protein Msl1                                               | 78.45  |
| F1M0Q9 | Protein Pm20d1 (Fragment)                                  | 74.24  |
| D4A404 | Protein Psd3                                               | 91.46  |
| D3Z8R4 | Protein Rbm25l1                                            | 116.19 |
| D3ZW64 | Protein RGD1560556                                         | 43.61  |
| D3ZH53 | Protein RGD1561871                                         | 56.93  |
| F1LT36 | Protein RGD1564698                                         | 86.29  |
| F1LVT5 | Protein Rundc1                                             | 42.69  |
| D4A4R7 | Protein Serpina1f                                          | 70.53  |
| M0R5B1 | Protein Shisa8                                             | 78.09  |
| D4A3B0 | Protein Tln2                                               | 47.51  |
| D3ZE22 | Protein Ttl3                                               | 46.14  |
| D4A7F0 | Protein Ubr3 (Fragment)                                    | 26.72  |
| P85973 | Purine nucleoside phosphorylase                            | 111.91 |
| D3ZXK9 | Purine nucleoside phosphorylase (Fragment)                 | 111.91 |
| Q3B7T9 | Rab11 family-interacting protein 1                         | 65.46  |
| P49797 | Regulator of G-protein signaling 3                         | 58.82  |
| G3V9Q2 | Regulator of G-protein signalling 3, isoform CRA_b         | 58.82  |
| Q9R095 | Sperm flagellar protein 2                                  | 51.95  |
| D3ZTA9 | Sulfotransferase                                           | 59.56  |
| Q4V8I3 | Tensin-4                                                   | 41.40  |
| F1LYK6 | tRNA (guanine(37)-N1)-methyltransferase                    | 60.45  |
| P0CD94 | Ubiquinol-cytochrome-c reductase complex assembly factor 3 | 153.05 |
| P85972 | Vinculin                                                   | 96.17  |
| Q5MYW4 | Zinc finger protein 667                                    | 43.27  |

Identified proteins are organized according to the alphabetical order of proteins. The ID is based on protein ID from the UniProt protein database (<http://www.uniprot.org/>).

**Supplementary Table S2.** Proteins identified exclusively in the jejunum of rats chronically exposed to water containing 10 mgF/L.

| <b><sup>a</sup>Access number</b> | <b>Protein name</b>                                                         | <b><i>PLGS Score</i></b> |
|----------------------------------|-----------------------------------------------------------------------------|--------------------------|
| Q6AY33                           | Acrosin-binding protein                                                     | 56.20                    |
| P38918                           | Aflatoxin B1 aldehyde reductase member 3                                    | 153.75                   |
| Q6PCU3                           | Aldoc protein                                                               | 68.15                    |
| Q9JH9                            | Alpha-2u globulin                                                           | 53.82                    |
| D3ZVB9                           | Ankyrin repeat domain 23 (Predicted), isoform CRA_a                         | 104.93                   |
| D3ZCC5                           | Ankyrin repeat domain 24 (Predicted), isoform CRA_d                         | 59.06                    |
| Q07936                           | Annexin A2                                                                  | 117.91                   |
| Q4V8H5                           | Aspartyl aminopeptidase                                                     | 90.11                    |
| Q8R4G8                           | BTB/POZ domain-containing protein KCTD1                                     | 60.79                    |
| O35783                           | Calumenin                                                                   | 127.44                   |
| Q66HA5                           | Coiled-coil and C2 domain-containing protein 1A                             | 44.93                    |
| G3V927                           | Discs, large homolog-associated protein 4 (Drosophila)                      | 52.25                    |
| P97839                           | Disks large-associated protein 4                                            | 54.65                    |
| Q63572                           | Dual specificity testis-specific protein kinase 1                           | 95.42                    |
| Q64610                           | Ectonucleotide pyrophosphatase/phosphodiesterase family member 2            | 85.33                    |
| P05197                           | Elongation factor 2                                                         | 55.56                    |
| M0RBF8                           | Exocyst complex component 4                                                 | 60.85                    |
| P09117                           | Fructose-bisphosphate aldolase C                                            | 95.90                    |
| Q5I287                           | Germ cell-less homolog 1 (Drosophila), isoform CRA_a                        | 60.01                    |
| B5DEZ6                           | Glucosamine-6-phosphate isomerase                                           | 97.01                    |
| Q04807                           | Glycosylation-dependent cell adhesion molecule 1                            | 151.29                   |
| Q63942                           | GTP-binding protein Rab-3D                                                  | 72.18                    |
| Q3KRF2                           | High density lipoprotein binding protein (Vigilin)                          | 39.09                    |
| G3V6G1                           | Immunoglobulin joining chain                                                | 105.29                   |
| Q920F3                           | KH domain-containing, RNA-binding, signal transduction-associated protein 2 | 56.02                    |
| Q5U2S4                           | Leucine rich repeat containing 2                                            | 59.37                    |
| Q8R5M3                           | Leucine-rich repeat-containing protein 15                                   | 35.57                    |
| M0R476                           | Metabotropic glutamate receptor 1                                           | 35.57                    |
| P31424                           | Metabotropic glutamate receptor 5                                           | 48.36                    |
| F1MAQ5                           | Microtubule-associated protein                                              | 26.44                    |
| P15146                           | Microtubule-associated protein 2                                            | 26.44                    |
| P02688                           | Myelin basic protein                                                        | 87.34                    |
| G3V6P7                           | Myosin, heavy polypeptide 9, non-muscle                                     | 35.64                    |
| Q62812                           | Myosin-9                                                                    | 35.64                    |
| P97738                           | Neuronal pentraxin-2                                                        | 59.16                    |
| Q2YDU6                           | Nuclear prelamin A recognition factor                                       | 61.54                    |
| D3ZLY6                           | Olfactory receptor                                                          | 121.70                   |
| P0CAX5                           | Oligophrenin-1                                                              | 36.60                    |
| P00481                           | Ornithine carbamoyltransferase, mitochondrial                               | 93.90                    |
| F1LRE5                           | Oxysterol-binding protein                                                   | 37.41                    |
| D3ZLH5                           | Plexin-B3                                                                   | 41.08                    |
| O08628                           | Procollagen C-endopeptidase enhancer 1                                      | 80.57                    |
| D4AAT1                           | Protein Adamts8                                                             | 60.31                    |
| D3ZZ20                           | Protein Afg311                                                              | 58.65                    |
| F1LN92                           | Protein Afg312                                                              | 50.73                    |
| D4A7K0                           | Protein Tmem242                                                             | 144.96                   |
| D4AD05                           | Protein Crocc                                                               | 32.25                    |
| Q5XI02                           | Protein disulfide-isomerase-like protein of the testis                      | 37.97                    |

|            |                                                  |        |
|------------|--------------------------------------------------|--------|
| D3ZRE8     | Protein Efcc1                                    | 70.94  |
| M0R5H1     | Protein Etl4 (Fragment)                          | 44.63  |
| D3ZX40     | Protein Fam65c                                   | 47.87  |
| F1LSX0     | Protein Gzmb12 (Fragment)                        | 83.25  |
| Q6IFV5     | Protein Krt36                                    | 65.67  |
| G3V6H0     | Protein LOC100363782                             | 72.18  |
| F1LWE4     | Protein LOC100910977                             | 72.21  |
| M0R620     | Protein LOC100912565                             | 270.84 |
| F1M1G2     | Protein Maneal                                   | 47.13  |
| D3ZV75     | Protein Mfsd1                                    | 71.46  |
| D4AB60     | Protein Mtbp                                     | 38.64  |
| D3ZFU9     | Protein Mylk                                     | 46.23  |
| M0R915     | Protein Naip6                                    | 47.42  |
| D3Z8Y9     | Protein Pnma3                                    | 88.38  |
| D4A0G7     | Protein Rab37                                    | 72.18  |
| F1M8F0     | Protein Rbm7                                     | 65.13  |
| B2RYC3     | Protein RGD1306746                               | 53.17  |
| F7FM32     | Protein RGD1311345                               | 78.42  |
| D3ZYC4     | Protein RGD1563680                               | 112.27 |
| D3ZN86     | Protein RGD1565323                               | 147.87 |
| B5DFL9     | Protein Sestd1                                   | 75.09  |
| D4AC81     | Protein Slc51a                                   | 59.38  |
| F1M2T7     | Protein Srrm4                                    | 49.73  |
| D3ZAF7     | Protein Tbc1d2b                                  | 51.81  |
| B5DFD6     | Protein Tie1                                     | 36.14  |
| D4AA88     | Protein Tp73                                     | 50.65  |
| Q9EPJ1     | Protein Twist1                                   | 112.96 |
| F1M8H2     | Protein Wars2                                    | 61.46  |
| A0A096MIV6 | Protein Wbscr17                                  | 54.48  |
| B2RYB0     | Protein Wdr251                                   | 53.51  |
| D4A365     | Protein Zbtb40                                   | 42.10  |
| Q5RKJ9     | RAB10, member RAS oncogene family                | 72.18  |
| Q62796     | RalA-binding protein 1                           | 50.87  |
| Q9Z1C8     | Rap guanine nucleotide exchange factor 3         | 41.18  |
| P35281     | Ras-related protein Rab-10                       | 72.18  |
| P35284     | Ras-related protein Rab-12                       | 72.18  |
| P61107     | Ras-related protein Rab-14                       | 72.18  |
| Q6NYB7     | Ras-related protein Rab-1A                       | 72.18  |
| P10536     | Ras-related protein Rab-1B                       | 72.18  |
| P51156     | Ras-related protein Rab-26                       | 72.18  |
| Q5U316     | Ras-related protein Rab-35                       | 72.18  |
| P63012     | Ras-related protein Rab-3A                       | 72.18  |
| P62824     | Ras-related protein Rab-3C                       | 72.18  |
| Q53B90     | Ras-related protein Rab-43                       | 72.18  |
| P05714     | Ras-related protein Rab-4A                       | 72.18  |
| P51146     | Ras-related protein Rab-4B                       | 72.18  |
| M0RC99     | Ras-related protein Rab-5A                       | 84.73  |
| P35280     | Ras-related protein Rab-8A                       | 72.18  |
| P70550     | Ras-related protein Rab-8B                       | 72.18  |
| D4AAM1     | RCG48016, isoform CRA_c                          | 395.50 |
| Q5FVT1     | RCG55460, isoform CRA_a                          | 50.87  |
| P81128     | Rho GTPase-activating protein 35                 | 69.97  |
| R9PXY2     | RIB43A domain with coiled-coils 2, isoform CRA_a | 54.87  |
| P20793     | Serine/threonine-protein kinase MAK              | 64.55  |
| P36394     | Sex-determining region Y protein (Fragment)      | 63.97  |

|        |                                                                                                            |        |
|--------|------------------------------------------------------------------------------------------------------------|--------|
| D3ZED8 | Protein Pmel                                                                                               | 46.91  |
| P31647 | Sodium- and chloride-dependent GABA transporter 3                                                          | 56.87  |
| O35814 | Stress-induced-phosphoprotein 1                                                                            | 115.58 |
| G3V8I4 | Syntaxin 4A (Placental), isoform CRA_a                                                                     | 52.26  |
| Q08850 | Syntaxin-4                                                                                                 | 52.26  |
| Q68FW7 | Threonine--tRNA ligase, mitochondrial                                                                      | 51.32  |
| E9PTD9 | Toll-like receptor                                                                                         | 53.37  |
| O08950 | Transcription initiation factor IIA subunit 2                                                              | 126.89 |
| F1M7T6 | Translocon-associated protein subunit gamma                                                                | 154.77 |
| Q03191 | Trefoil factor 3                                                                                           | 140.71 |
| P48500 | Triosephosphate isomerase                                                                                  | 87.60  |
| Q7TNK6 | tRNA (guanine(10)-N2)-methyltransferase homolog                                                            | 68.47  |
| P63149 | Ubiquitin-conjugating enzyme E2 B                                                                          | 117.61 |
| Q5RJN9 | Uncharacterized protein C14orf79 homolog                                                                   | 168.06 |
| Q9Z1A6 | Vigilin                                                                                                    | 44.45  |
| Q71RJ2 | Voltage-dependent calcium channel gamma-2 subunit<br>WD repeat domain phosphoinositide-interacting protein | 114.44 |
| Q5U2Y0 | 4                                                                                                          | 65.00  |

Identified proteins are organized according to the alphabetical order of proteins. The ID is based on protein ID from the UniProt protein database (<http://www.uniprot.org/>).

**Supplementary Table S3.** Proteins identified exclusively in the jejunum of rats chronically exposed to water containing 50 mgF/L.

| <b><sup>a</sup>Access number</b> | <b>Protein name</b>                                  | <b>PLGS Score</b> |
|----------------------------------|------------------------------------------------------|-------------------|
| Q63570                           | 26S protease regulatory subunit 6B                   | 97.66             |
| P62198                           | 26S protease regulatory subunit 8                    | 61.88             |
| Q6AYY8                           | Acetyl-coenzyme A transporter 1                      | 56.97             |
| Q6P7S1                           | Acid ceramidase                                      | 66.82             |
| Q5U301                           | A-kinase anchor protein 2                            | 118.01            |
| D4ADM6                           | Alkaline phosphatase                                 | 55.07             |
| Q63910                           | Alpha globin                                         | 59.39             |
| G3V7W7                           | Aminopeptidase N                                     | 64.03             |
| P15684                           | Aminopeptidase N                                     | 64.03             |
| Q62901                           | Arginine-glutamic acid dipeptide repeats protein     | 26.94             |
| B5DEX9                           | Arid3a protein                                       | 60.04             |
| D3ZAF6                           | ATP synthase subunit f, mitochondrial                | 145.66            |
| D3ZCM3                           | ATP-binding cassette, sub-family G (WHITE), member 4 | 73.10             |
| P30835                           | ATP-dependent 6-phosphofructokinase, liver type      | 60.62             |
| D3ZXQ0                           | Carboxylic ester hydrolase                           | 42.22             |
| Q9WTT2                           | Caseinolytic peptidase B protein homolog             | 29.83             |
| F1LMT2                           | Centlein                                             | 48.71             |
| Q3B7T8                           | Centrosomal protein of 44 kDa                        | 77.36             |
| Q68EJ0                           | Cytochrome b5 reductase 4                            | 46.55             |
| D3Z7Y1                           | Cytochrome P450 2C7 (Fragment)                       | 49.22             |
| D3ZH41                           | Cytoskeleton-associated protein 4 (Predicted)        | 75.43             |
| Q5M9G8                           | DDB1- and CUL4-associated factor 11                  | 70.70             |
| P60924                           | Death ligand signal enhancer                         | 54.09             |
| Q5U2T2                           | Dehydrololichyl diphosphate synthase                 | 54.29             |
| Q5RK17                           | Diablo homolog (Drosophila)                          | 69.43             |
| Q3B8Q2                           | Eukaryotic initiation factor 4A-III                  | 94.58             |
| F1LMQ2                           | Farnesyl pyrophosphate synthase                      | 65.62             |
| D4ABB4                           | F-box/LRR-repeat protein 15                          | 66.59             |
| P43278                           | Histone H1.0                                         | 60.10             |
| D3ZMG5                           | Hypothetical LOC300207 (Predicted)                   | 90.09             |
| D3ZFH4                           | Hypothetical LOC314467 (Predicted)                   | 40.80             |
| Q63258                           | Integrin alpha-7                                     | 44.08             |
| D4A6K5                           | Interleukin 27 receptor, alpha (Predicted)           | 53.50             |
| B2RYC8                           | Interleukin-1 receptor-associated kinase 3           | 65.66             |
| Q6IFW6                           | Keratin, type I cytoskeletal 10                      | 49.00             |
| Q6IFW8                           | Keratin, type I cytoskeletal 27                      | 108.44            |
| D3ZIA5                           | Kinesin-like protein                                 | 73.68             |
| Q62813                           | Limbic system-associated membrane protein            | 53.88             |
| Q6QI46                           | LRRGT00162                                           | 61.29             |
| P84817                           | Mitochondrial fission 1 protein                      | 71.56             |
| Q63454                           | Mitogen-activated protein kinase 4 (Fragment)        | 53.29             |
| Q9WUJ3                           | Myomegalin                                           | 57.04             |
|                                  | NIMA (Never in mitosis gene a)-related kinase 11     |                   |
| D4A3H8                           | (Predicted)                                          | 65.44             |
| G3V8R1                           | Nucleobindin 2, isoform CRA_b                        | 54.07             |
| B5DFH4                           | Papss2 protein                                       | 121.84            |
| Q920Q0                           | Paralemmin-1                                         | 63.67             |
| Q5FVS5                           | Perforin 1 (Pore forming protein)                    | 46.18             |
| P35763                           | Perforin-1                                           | 46.18             |

|        |                                                       |        |
|--------|-------------------------------------------------------|--------|
| O35244 | Peroxiredoxin-6                                       | 87.65  |
| D3ZTP9 | Piwi-like protein                                     | 47.65  |
| D3ZAN6 | Poly(A) polymerase gamma (Predicted)                  | 78.89  |
|        | Polymerase (DNA directed), iota (Predicted), isoform  |        |
| D4A8I8 | CRA_c                                                 | 60.68  |
| D3ZB30 | Polypyrimidine tract binding protein 1, isoform CRA_c | 53.14  |
| Q00438 | Polypyrimidine tract-binding protein 1                | 53.14  |
| Q5PQT5 | Progesterin and adipoQ receptor family member V       | 55.50  |
| Q4V7A8 | Protein ABHD18                                        | 55.91  |
| D3ZTI3 | Protein Cdh24                                         | 32.21  |
| F1M7J7 | Protein Cep250 (Fragment)                             | 51.99  |
| O88767 | Protein deglycase DJ-1                                | 79.83  |
| F1LT14 | Protein Frmd5                                         | 69.00  |
| G3V8R3 | Protein Hbz                                           | 59.39  |
| G3V646 | Protein Hsf2bp                                        | 50.15  |
| M0R3X5 | Protein L1td1                                         | 37.55  |
| D4A7Z5 | Protein LOC100360940                                  | 69.43  |
| G3V8P7 | Protein LOC100911794                                  | 31.65  |
| M0R983 | Protein LOC688320                                     | 70.10  |
| F1M9Z7 | Protein Lrrc3c                                        | 64.06  |
| B0BNB4 | Protein Meaf6                                         | 59.42  |
| D4A7N2 | Protein Mettl10                                       | 84.91  |
| D3ZKF3 | Protein Morc1                                         | 54.30  |
| F1LMD5 | Protein Mtf2                                          | 108.10 |
| D3ZD36 | Protein RGD1306739                                    | 41.58  |
| G3V8I7 | Protein RGD735029                                     | 54.09  |
| D3ZC97 | Protein Rgs9bp                                        | 66.61  |
| F1LX07 | Protein Slc25a12 (Fragment)                           | 65.62  |
| F1LYZ6 | Protein Snapc4                                        | 65.30  |
| M0R8U7 | Protein Spata17 (Fragment)                            | 173.95 |
| D4A9F1 | Protein Tango6                                        | 40.21  |
| F1LV37 | Protein Tnrc6b                                        | 28.69  |
| F1LUG6 | Protein Ttc24 (Fragment)                              | 38.92  |
| D4ACL2 | Protein Ttc38                                         | 54.53  |
| D4AA63 | Protein Ubqln2                                        | 42.89  |
| Q5J3K1 | Protein Vom1r62                                       | 72.76  |
| D3ZIN6 | Protein Zfp27 (Fragment)                              | 91.09  |
| D4A1E1 | Protein Zmynd15                                       | 52.35  |
| Q921A2 | Proton myo-inositol cotransporter                     | 59.04  |
| F1M7Z9 | Regulating synaptic membrane exocytosis 4             | 111.56 |
| Q64578 | Sarcoplasmic/endoplasmic reticulum calcium ATPase 1   | 50.17  |
| Q4FZX7 | Signal recognition particle receptor subunit beta     | 106.18 |
| P48721 | Stress-70 protein, mitochondrial                      | 57.24  |
| P23739 | Sucrase-isomaltase, intestinal                        | 32.26  |
| Q3MIE4 | Synaptic vesicle membrane protein VAT-1 homolog       | 148.10 |
| Q5XIM9 | T-complex protein 1 subunit beta                      | 56.14  |
| Q6AYM2 | Tektin-2                                              | 103.76 |
| P49430 | Thromboxane-A synthase                                | 36.34  |
| P17164 | Tissue alpha-L-fucosidase                             | 53.61  |
| D4A556 | Uncharacterized protein                               | 55.91  |
| Q3KRF3 | Uncharacterized protein C1orf131 homolog              | 58.30  |
| Q4V8C4 | WD repeat-containing protein 5B                       | 69.96  |

Identified proteins are organized according to the alphabetical order of proteins. The ID is based on protein ID from the UniProt protein database (<http://www.uniprot.org/>).



**Supplementary Table S4.** Proteins identified with significantly altered expression in the jejunum of rats treated with 10 mgF/L in the drinking water in comparison to control.

| <sup>a</sup> Access number | Protein name                                              | PLGS Score | Ratio 10 mg/L F: Control |
|----------------------------|-----------------------------------------------------------|------------|--------------------------|
| O70177                     | Carboxylic ester hydrolase                                | 77.78      | 1.79                     |
| P04642                     | L-lactate dehydrogenase A chain                           | 185.71     | 1.65                     |
| F1LPR6                     | Protein Ighm(Fragment)                                    | 79.05      | 1.54                     |
| P42123                     | L-lactate dehydrogenase B chain                           | 59.78      | 1.52                     |
| D4A2K1                     | Protein Hoga1                                             | 87.86      | 1.45                     |
| G3V9Y1                     | Myosin, heavy polypeptide 10, non-muscle, isoform CRA_b   | 68.24      | 1.34                     |
| P01946                     | Hemoglobin subunit alpha-1/2                              | 579.84     | 1.27                     |
| Q63862                     | Myosin-11 (Fragments)                                     | 110.66     | 1.26                     |
| A0A0A0MY09                 | Endoplasmic reticulum chaperone protein                   | 82.66      | 1.25                     |
| F7FK40                     | Tropomyosin 1, alpha, isoform CRA_c                       | 165.97     | 1.25                     |
| Q64122                     | Myosin regulatory light polypeptide 9                     | 318.32     | 1.22                     |
| Q66HD0                     | Endoplasmic reticulum chaperone protein                   | 82.66      | 1.21                     |
| P13832                     | Myosin regulatory light chain RLC-A                       | 205.79     | 1.20                     |
| B0BMS8                     | Myosin regulatory light chain 19                          | 318.32     | 1.19                     |
| P06685                     | Sodium/potassium-transporting ATPase subunit alpha-1      | 100.28     | 1.19                     |
| P18666                     | Myosin regulatory light chain 12B                         | 205.79     | 1.17                     |
| Q9ESV6                     | Glyceraldehyde-3-phosphate dehydrogenase, testis-specific | 240.77     | 1.14                     |
| P00884                     | Fructose-bisphosphate aldolase B                          | 391.00     | 1.13                     |
| Q66HT1                     | Fructose-bisphosphate aldolase                            | 391.00     | 1.12                     |
| P04797                     | Glyceraldehyde-3-phosphate dehydrogenase                  | 393.6      | 1.12                     |
| D3ZRN3                     | Protein Actb12                                            | 1720.7     | 1.06                     |
| P04636                     | Malate dehydrogenase, mitochondrial                       | 1140.94    | 0.91                     |
| P02770                     | Serum albumin                                             | 478.3      | 0.89                     |
| P10111                     | Peptidyl-prolyl cis-trans isomerase A                     | 567.27     | 0.82                     |
| D3ZJ08                     | Histone H3                                                | 139.14     | 0.79                     |
| P62804                     | Histone H4                                                | 1762.24    | 0.71                     |
| M0R6Y8                     | Phosphoglycerate kinase                                   | 440.19     | 0.54                     |
| P04906                     | Glutathione S-transferase P                               | 130.58     | 0.54                     |
| Q9ERC0                     | Neuropeptide Y/peptide YY-Y2 receptor                     | 77.69      | 0.53                     |
| D4A8D5                     | Filamin, beta (Predicted)                                 | 56.51      | 0.30                     |

Identified proteins are organized according to the ratio score. The ID is based on protein ID from the UniProt protein database (<http://www.uniprot.org/>).

**Supplementary Table S5.** Proteins identified with significantly altered expression in the jejunum of rats treated with 50 mgF/L in the drinking water in comparison to control.

| <sup>a</sup> Access number | Protein name                             | <i>PLGS</i> Score | Ratio 50 mg/L F: Control |
|----------------------------|------------------------------------------|-------------------|--------------------------|
| F1LPR6                     | Protein Ighm (Fragment)                  | 79.05             | 1.86                     |
| G3V741                     | Phosphate carrier protein, mitochondrial | 58.81             | 1.84                     |
| Q00729                     | Histone H2B type 1-A                     | 113.51            | 1.79                     |
| P01946                     | Hemoglobin subunit alpha-1/2             | 579.84            | 1.57                     |
| P04642                     | L-lactate dehydrogenase A chain          | 185.71            | 1.57                     |
| Q63862                     | Myosin-11 (Fragments)                    | 110.66            | 1.36                     |
| Q64122                     | Myosin regulatory light polypeptide 9    | 318.32            | 1.27                     |
| P13832                     | Myosin regulatory light chain RLC-A      | 205.79            | 1.25                     |
| A0A0A0MY09                 | Endoplasmin                              | 82.66             | 1.25                     |
| P68370                     | Tubulin alpha-1A chain                   | 274.37            | 1.25                     |
| B0BMS8                     | My19 protein                             | 318.32            | 1.23                     |
| Q66HD0                     | Endoplasmin                              | 82.66             | 1.22                     |
| P85108                     | Tubulin beta-2A chain                    | 453.08            | 1.22                     |
| P18666                     | Myosin regulatory light chain 12B        | 205.79            | 1.21                     |
| F7FK40                     | Tropomyosin 1, alpha, isoform CRA_c      | 165.97            | 1.21                     |
| P48675                     | Desmin                                   | 222.3             | 1.15                     |
| D4A2K1                     | Protein Hoga1                            | 87.86             | 1.14                     |
| P02091                     | Hemoglobin subunit beta-1                | 1483.69           | 1.13                     |
| P00770                     | Mast cell protease 2                     | 401.85            | 1.13                     |
| P11517                     | Hemoglobin subunit beta-2                | 615.47            | 1.11                     |
| P34058                     | Heat shock protein HSP 90-beta           | 202.44            | 1.11                     |
| O88752                     | Epsilon 1 globin                         | 661.9             | 1.09                     |
| D3ZRN3                     | Protein Actb12                           | 1720.70           | 1.05                     |
| P10719                     | ATP synthase subunit beta, mitochondrial | 722.19            | 0.95                     |
| P04636                     | Malate dehydrogenase, mitochondrial      | 1140.94           | 0.93                     |
| P02262                     | Histone H2A type 1                       | 863.45            | 0.88                     |
| Q64598                     | Histone H2A type 1-F                     | 863.45            | 0.88                     |
| Q4FZT6                     | Histone H2A type 3                       | 863.45            | 0.88                     |
| P0CC09                     | Histone H2A type 2-A                     | 863.45            | 0.87                     |
| D3ZXP3                     | Histone H2A                              | 863.45            | 0.87                     |
| P0C169                     | Histone H2A type 1-C                     | 863.45            | 0.87                     |
| P0C170                     | Histone H2A type 1-E                     | 863.45            | 0.87                     |
| Q00728                     | Histone H2A type 4                       | 863.45            | 0.87                     |
| A9UMV8                     | Histone H2A.J                            | 863.45            | 0.87                     |
| P0C0S7                     | Histone H2A.Z                            | 863.45            | 0.87                     |
| P84245                     | Histone H3.3                             | 139.14            | 0.66                     |
| Q6LED0                     | Histone H3.1                             | 139.14            | 0.64                     |
| D3ZJ08                     | Histone H3                               | 139.14            | 0.63                     |
| P62804                     | Histone H4                               | 176.24            | 0.61                     |
| Q66H84                     | MAP kinase-activated protein kinase 3    | 119.36            | 0.53                     |

Identified proteins are organized according to the ratio score. The ID is based on protein ID from the UniProt protein database (<http://www.uniprot.org/>).
